# Supplementary material
Source: Springer Nature journal article supplement (https://www.springermedizin.de/resource/supplementary/12990_2010_306_MOESM7_ESM.pdf/9612994)

**A (MS/CI)**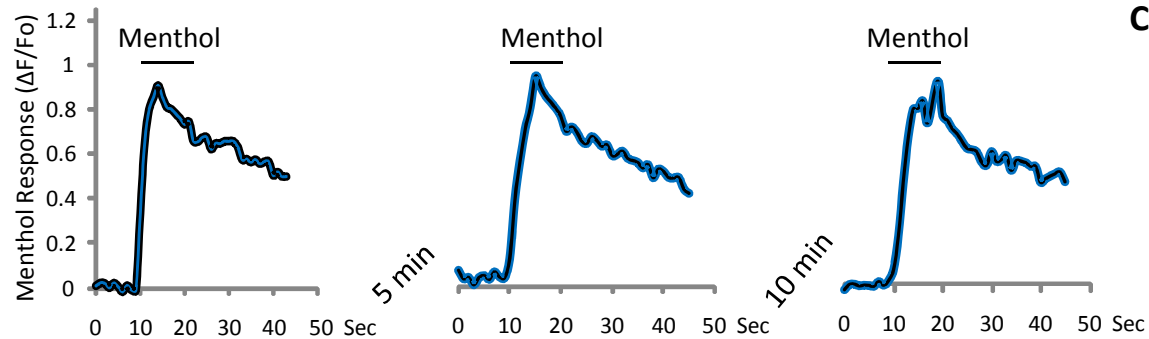**B (MS/CS)**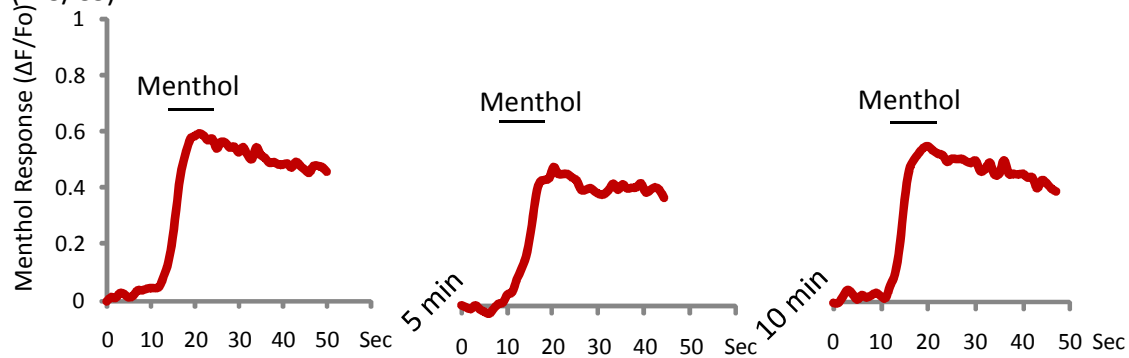**C**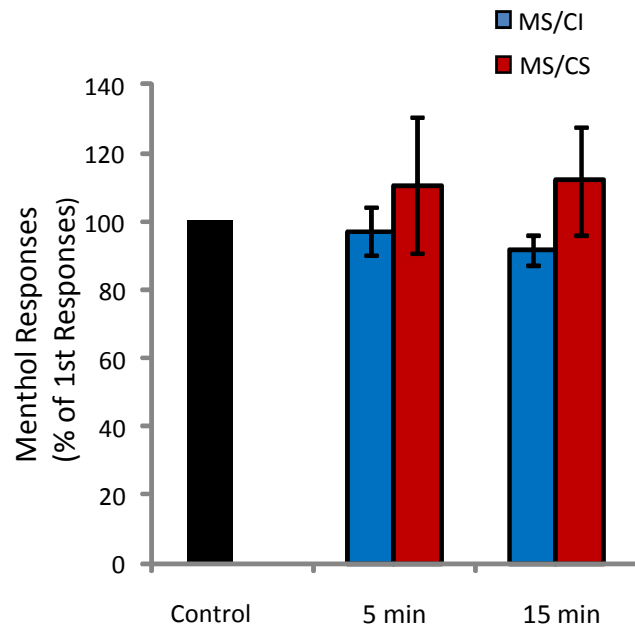

Supplement: MOESM7 [file 9612994]
